# Supplementary material for: Molecular dynamics simulations reveal distinct differences in conformational dynamics and thermodynamics between the unliganded and CD4-bound states of HIV-1 gp120
Source: Royal Society of Chemistry journal article supplement (doi:10.1039/c9cp06706j), 2020-01-01
Supplement: c9cp06706j1.pdf [file c9cp06706j1.pdf]

# **Molecular dynamics simulations reveal distinct differences in conformational dynamics and thermodynamics between the unliganded and CD4-bound states of HIV-1 gp120**

Yi Li,<sup>a,b</sup> Lei Deng,<sup>a</sup> Jing Liang,<sup>a</sup> Guang-Heng Dong,<sup>a</sup> Yuan-Ling Xia,<sup>a</sup> Yun-Xin Fu<sup>\*c</sup> and Shu-Qun Liu<sup>\*a</sup>

<sup>a</sup>*State Key Laboratory for Conservation and Utilization of Bio-Resources in Yunnan & School of Life Sciences, Yunnan University, Kunming 650091, China. E-mail: shuqunliu@ynu.edu.cn*

<sup>b</sup>*College of Mathematics and Computer Science, Dali University, Dali 671003, China.*

<sup>c</sup>*Human Genetics Center and Division of Biostatistics, School of Public Health, the University of Texas Health Science Center, Houston, USA. E-mail: Yunxin.Fu@uth.tmc.edu*

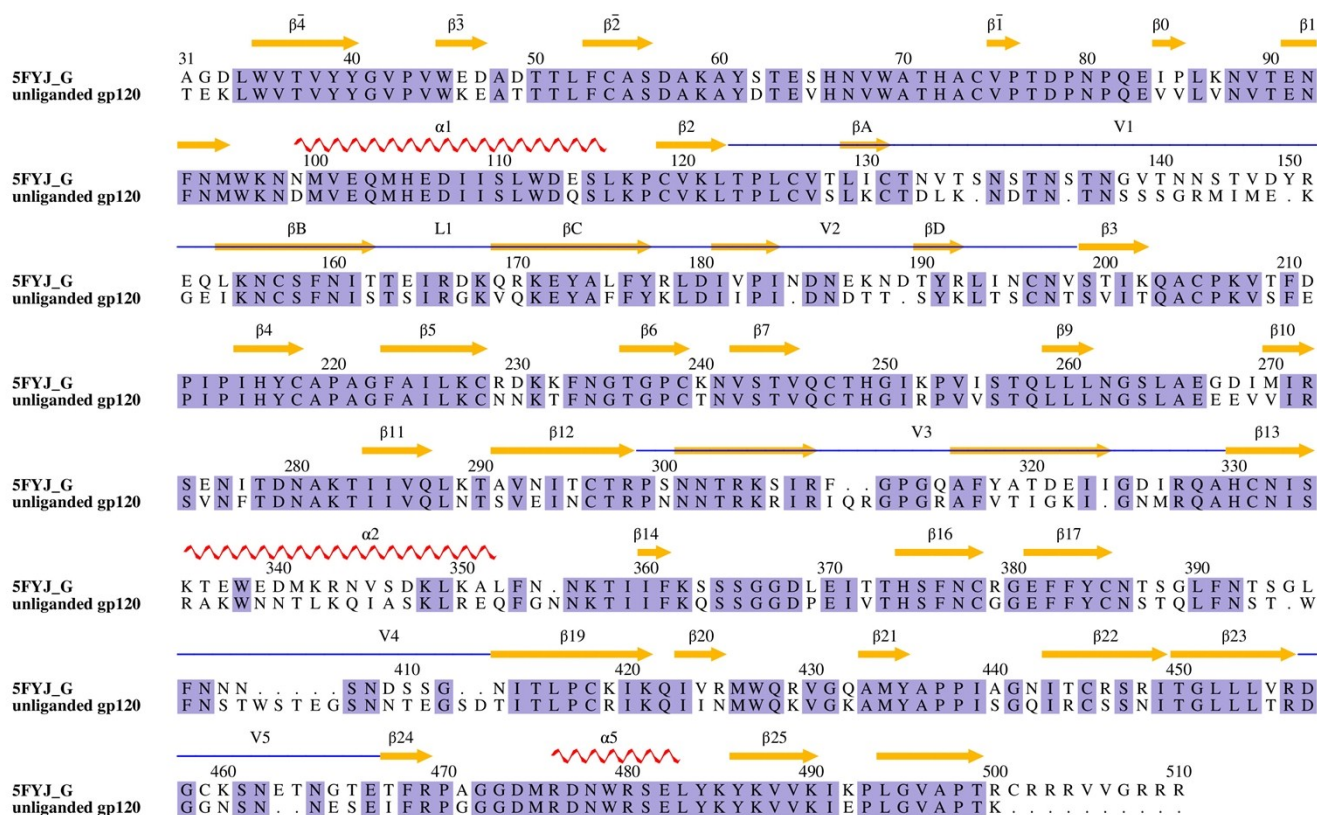

**Fig. S1** Sequence alignment for building the structural model of the unliganded gp120. “5FYJ\_G” represents the sequence of the template extracted from the crystal structure with PDB ID 5FYJ (chain G),<sup>1</sup> and “unliganded gp120” represents the target sequence. Conserved residues are shaded in light blue. Regular secondary structural elements are numbered according to the crystal structures with PDB IDs 3J70<sup>2</sup> and 3JWD<sup>3</sup> from the HIV-1 HXBc2 isolate, with spirals (red) and arrows (orange) denoting the  $\alpha$ -helix and  $\beta$ -strand, respectively. The four blue line segments drawn above the alignment indicate the variable regions V1/V2, V3, V4, and V5, respectively. In the V1/V2 region, the four  $\beta$ -strands are labelled  $\beta$ A to  $\beta$ D, respectively, and the three connecting loops, i.e., the loop V1 (between  $\beta$ A and  $\beta$ B), L1 (between  $\beta$ B and  $\beta$ C), and V2 (between  $\beta$ C and  $\beta$ D), are also labelled.

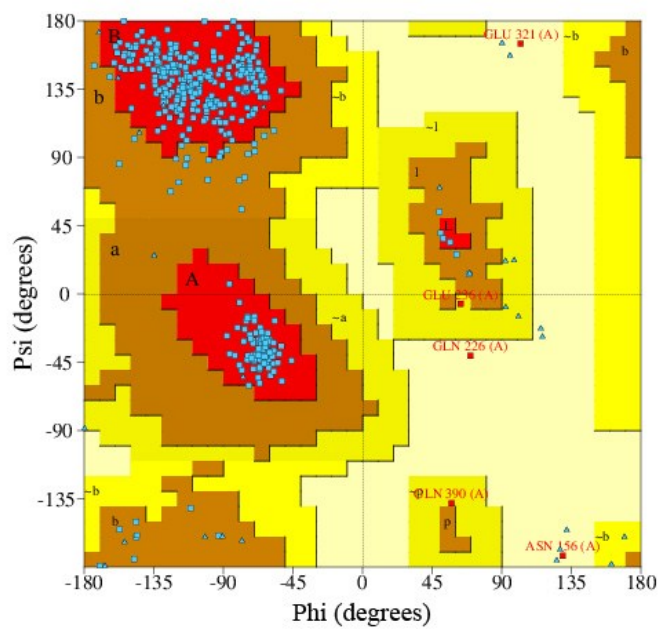

|                            |               | No. of residues | %=tage |
|----------------------------|---------------|-----------------|--------|
| Most favored regions       | [A,B,L]       | 373             | 91.0%  |
| Additional allowed regions | [a,b,l,p]     | 32              | 7.8%   |
| Generously allowed regions | [~a,~b,~l,~p] | 2               | 0.5%   |
| Disallowed regions         | [XX]          | 3               | 0.7%   |
| Total number of residues   |               | 462             |        |

Fig. S2 Ramachandran plot of the constructed structural model of the unliganded gp120.

**Table S1** Cosine contents of the first three eigenvectors (Eigs. 1 to 3) for the unliganded and CD4-complexed gp120s calculated from the equilibrated portions of the 10 independent replicas (10-100 ns; replicas 1-10) and the 900-ns joined equilibrium trajectories.

|            | Unliganded |        |        | CD4-complexed |        |        |
|------------|------------|--------|--------|---------------|--------|--------|
|            | Eig. 1     | Eig. 2 | Eig. 3 | Eig. 1        | Eig. 2 | Eig. 3 |
| Replica 1  | 0.5796     | 0.3210 | 0.0408 | 0.6624        | 0.2412 | 0.3600 |
| Replica 2  | 0.6543     | 0.0561 | 0.0024 | 0.0234        | 0.2040 | 0.0327 |
| Replica 3  | 0.3368     | 0.1697 | 0.0179 | 0.5688        | 0.0642 | 0.1059 |
| Replica 4  | 0.7652     | 0.2472 | 0.0024 | 0.0506        | 0.6243 | 0.3437 |
| Replica 5  | 0.0440     | 0.0816 | 0.0000 | 0.4934        | 0.0016 | 0.0807 |
| Replica 6  | 0.2240     | 0.0404 | 0.3412 | 0.5208        | 0.0222 | 0.0107 |
| Replica 7  | 0.8223     | 0.0963 | 0.0033 | 0.3998        | 0.3055 | 0.0016 |
| Replica 8  | 0.8381     | 0.3207 | 0.0703 | 0.6430        | 0.6253 | 0.4043 |
| Replica 9  | 0.4874     | 0.0274 | 0.0025 | 0.5999        | 0.3918 | 0.1189 |
| Replica 10 | 0.0862     | 0.0130 | 0.2126 | 0.7029        | 0.2496 | 0.0298 |
| Joined     | 0.1296     | 0.0266 | 0.0067 | 0.0137        | 0.0748 | 0.0070 |

## References

1. G. B. Stewart-Jones, C. Soto, T. Lemmin, G. Y. Chuang, A. Druz, R. Kong, P. V. Thomas, K. Wagh, T. Zhou, A. J. Behrens, T. Bylund, C. W. Choi, J. R. Davison, I. S. Georgiev, M. G. Joyce, Y. D. Kwon, M. Pancera, J. Taft, Y. Yang, B. Zhang, S. S. Shivatara, V. S. Shivatara, C. C. Lee, C. Y. Wu, C. A. Bewley, D. R. Burton, W. C. Koff, M. Connors, M. Crispin, U. Baxa, B. T. Korber, C. H. Wong, J. R. Mascola and P. D. Kwong, *Cell*, 2016, **165**, 813-826.
2. M. Rasheed, R. Bettadapura and C. Bajaj, *Structure*, 2015, **23**, 1138-1149.
3. M. Pancera, S. Majeed, Y. E. A. Ban, L. Chen, C. C. Huang, L. Kong, Y. D. Kwon, J. Stuckey, T. Zhou, J. E. Robinson, W. R. Schief, J. Sodroski, R. Wyatt and P. D. Kwong, *Proc. Natl. Acad. Sci. U. S. A.*, 2009, **107**, 1166-1171.
